# Supplementary material for: Characterization of D-Arabitol as Newly Discovered Carbon Source of Bacillus methanolicus
Source: PubMed Central journal article supplement (PMC6685057; doi:10.3389/fmicb.2019.01725), 2019-07-31
Supplement: Data_Sheet_1.pdf [file Data_Sheet_1.pdf]

## *Supplementary Material*

### Supplementary Tables

**Supplementary Table 1.** Primer sequences used in this study.

| <b>Primer</b> | <b>Sequence [5' → 3']</b>                                              | <b>Characteristics</b>                                                                                          |
|---------------|------------------------------------------------------------------------|-----------------------------------------------------------------------------------------------------------------|
| acF1          | cctgcaggtcgactctagaggaaggaggcccttcag<br>GTGAGTGAAATATACTTTGATGA<br>ATC | Amplification of <i>atIABCD</i> and <i>atIABCDE</i> for pVWEx1- <i>atIABCD</i> and pVWEx1- <i>atIABCDE</i> (fw) |
| acR1          | attgagctcggtaccgggTTAATCAATAG<br>GTGTCAACAATAC                         | Amplification of <i>atIABCD</i> for pVWEx1- <i>atIABCD</i> (rv)                                                 |
| acR2          | attgagctcggtaccgggTTATGATTTTT<br>CTGGATGGAAG                           | Amplification of <i>atIABCDE</i> for pVWEx1- <i>atIABCDE</i> (rv)                                               |
| aPDF          | cctgcaggtcgactctagaggaaggaggcccttcag<br>ATGAAAGCTTTAGTCAAAAAG          | Amplification of <i>atID</i> for pVWEx1- <i>atID</i>                                                            |
| aPDR          | gagctcggtaccggggatTTAATCAATA<br>GGTGTCAACAATAC                         |                                                                                                                 |
| MRF1          | TACATAAATAGGAGGTAGTAcata<br>TGTATATATCTGCAAGAGAAAG                     | Amplification of <i>mtIR</i> to confirm the absence of gDNA contamination of the RNA preparation                |
| MRR1          | TGGCGGGTACCATATGGATCCTT<br>ATACACTCCTTAATTCTTTTAATT<br>TTTC            |                                                                                                                 |
| PRIF          | GAAAGGAGGCCCTTCAGATGAAG<br>AAGCTTACTTTTGTCTGGAGCAGGT                   | Amplification of <i>proI</i> to confirm the absence of gDNA contamination of the RNA preparation                |
| PRIR          | TGGCGGGTACCATATGGATCCTC<br>ACTGCTTACTGTTACTGCTTCTG<br>TGT              |                                                                                                                 |
| RT03          | ATAGAATCGGAATAGTCATACCC<br>ATCTC                                       | BMMGA3_RS07365-<br>BMMGA3_RS07325 cDNA synthesis                                                                |
| 1fwd          | ATGATGCTTGATGTCAGATGTG                                                 | Amplification of<br>BMMGA3_RS07325 for<br>transcriptional organization analysis                                 |
| 2rvs          | GAAATGCCATTTGTAGGCAAAC                                                 |                                                                                                                 |
| 3fwd          | GTCATTGCTCCGAATACAGCGATT<br>CCTC                                       | Amplification of<br>BMMGA3_RS07330 ( <i>atIA</i> ) for<br>transcriptional organization analysis                 |
| 4rvs          | ACAGATCGGCCGTATCGACATAT<br>GAACC                                       |                                                                                                                 |
| 5fwd          | GCGACTGGTTTGCCTACAAATG                                                 | Amplification of<br>BMMGA3_RS07335 ( <i>atIB</i> ) for<br>transcriptional organization analysis                 |
| 6rvs          | GCCAAACAGCAAGCCTAGTATG                                                 |                                                                                                                 |
| 7fwd          | GCAAAGCGATAGAAGACC                                                     | Amplification of<br>BMMGA3_RS07340 ( <i>atIC</i> ) for<br>transcriptional organization analysis                 |
| 8rvs          | CTGACGTTACTCTGTCTC                                                     |                                                                                                                 |
| 9fwd          | TGTCGCATTTATCGTCGGTGCTTC                                               | Amplification of<br>BMMGA3_RS07345 ( <i>atID</i> ) for<br>transcriptional organization analysis                 |
| 10rv          | CCTATCATTCTCCATACGGTCCA<br>AGTG                                        |                                                                                                                 |
| 11fw          | ACGATGGTCGGATCTAGAAG                                                   |                                                                                                                 |

|      |                                 |                                                                           |
|------|---------------------------------|---------------------------------------------------------------------------|
| 12rv | CAGAGCCGCAAATACCTG              | Amplification of BMMGA3_RS07350 for transcriptional organization analysis |
| 13fo | GCACTTGGACCGTATGGGAGAAT<br>G    | Amplification of BMMGA3_RS07355 for transcriptional organization analysis |
| 14ro | AATTGCCGGTGCTCCTCGAAC           | Amplification of BMMGA3_RS07360 for transcriptional organization analysis |
| 15fo | GATCTCAGCTCCATTTC               |                                                                           |
| 16ro | AGTCAGGTGCTTTCCTC               |                                                                           |
| 17fw | GCCTTTGATGTAACACCTCATGAA<br>CTC | Amplification of BMMGA3_RS07365 for transcriptional organization analysis |
| 18rv | AACCGTTGAACATCATATTGCGG<br>ATCG |                                                                           |
| P151 | TGGGAGTAGTGGAACAGAAG            | qRT-PCR analysis of <i>repB</i> expression                                |
| P152 | GCCAAGCAACCTGTATTACC            |                                                                           |
| P135 | ATTTGCTCAAGCGGCATAGG            | qRT-PCR analysis of <i>mtlR</i> expression                                |
| P136 | GTTAGGCAGGTTTACCGTAG            |                                                                           |
| P139 | AACAAGGGTGGGCCGTTCTC            | qRT-PCR analysis of <i>mtlD</i> expression                                |
| P140 | ACCGCTTCCGCATCTTGTGG            |                                                                           |
| P141 | CCCATTGGTTGGATGGTTTC            | qRT-PCR analysis of <i>phi</i> expression                                 |
| P142 | AATCATTGGATCCGGCTCAG            |                                                                           |
| P143 | CAAGATCCGGTTCTGCTTTG            | qRT-PCR analysis of <i>hps</i> expression                                 |
| P144 | TGGATGAAATGGGCGTAGAC            |                                                                           |
| P158 | TGATTACATTGCGCCACTCG            | qRT-PCR analysis of BMMGA3_RS07325 expression                             |
| P159 | GTGAGGAATCGCTGTATTCG            | qRT-PCR analysis of BMMGA3_RS07330 ( <i>atIA</i> ) expression             |
| P160 | ATCGACGCTGTCATTGAGAG            |                                                                           |
| 4qrv | ACGCCAAATTTACGGGTTC             |                                                                           |
| P162 | AGCCTGCGGAACAGGAATTG            | qRT-PCR analysis of BMMGA3_RS07335 ( <i>atIB</i> ) expression             |
| P163 | CTAACAGATCGGCCGTATCG            |                                                                           |
| P164 | GGAATCGGCACGTGAATTAC            | qRT-PCR analysis of BMMGA3_RS07340 ( <i>atIC</i> ) expression             |
| P165 | CGTTGCTAAGTCACCGAATG            |                                                                           |
| P166 | TTAGGTCCCGGACCAATAGG            | qRT-PCR analysis of BMMGA3_RS07345 ( <i>atID</i> ) expression             |
| P167 | ACATCAGCACCGTATCCATC            |                                                                           |
| P168 | TTGGACCGTATGGGAGAATG            | qRT-PCR analysis of BMMGA3_RS07350 expression                             |
| P169 | TTAACGCTTATGGCCTCCTG            | qRT-PCR analysis of BMMGA3_RS07355 expression                             |
| P160 | TCAGCCGGTTCTCCTGTTAC            |                                                                           |
| P171 | GAGATCGCATTCCAAGATCC            | qRT-PCR analysis of BMMGA3_RS07360 expression                             |
| P145 | TTGGCAACATCAAGGCCAAC            |                                                                           |
| P146 | TCTTCGTGGCGGATTAAGTG            | qRT-PCR analysis of BMMGA3_RS07365 expression                             |
| P172 | TTGCAAGCAGGAGTGAAAGC            |                                                                           |
| P173 | ACATTCACTGCCAGGATGAC            |                                                                           |

Overlapping regions are shown in lower case, ribosome binding sites are shown in bold; fw: forward primer, rv: reverse primer.

**Supplementary Table 2.** Mapping and coverage characteristics of *B. methanolicus* MGA3 generated cDNA libraries.

|              |                       | <b>Mannitol condition</b> | <b>Arabitol condition</b> |
|--------------|-----------------------|---------------------------|---------------------------|
| Raw reads    |                       | 3,200,444                 | 2,728,707                 |
| Mapped reads |                       | 3,163,610                 | 2,684,972                 |
| Coverage     | Chromosome            | 89.50 %                   | 88.16 %                   |
|              | Natural plasmid pBM19 | 9.16 %                    | 10.09 %                   |
|              | Natural plasmid pBM69 | 0.53 %                    | 0.71 %                    |

**Supplementary Table 3.** List of genes with altered expression in *B. methanolicus* MGA3 cultivated with arabitol in comparison to mannitol as sole carbon source.

| <b>Locus tag</b>      | <b>Gene</b>             | <b>Annotation</b>                                         | <b>Log2 fold change of relative RNA levels (arabitol/mannitol)<sup>a</sup></b> |
|-----------------------|-------------------------|-----------------------------------------------------------|--------------------------------------------------------------------------------|
| <b>BMMGA3_RS01065</b> | <i>mtlA<sup>b</sup></i> | <b>PTS mannitol transporter subunit IICBA<sup>b</sup></b> | <b>-4.2</b>                                                                    |
| <b>BMMGA3_RS01070</b> | <i>mtlR<sup>b</sup></i> | <b>transcriptional regulator MtlR<sup>b</sup></b>         | <b>-4.6</b>                                                                    |
| <b>BMMGA3_RS01075</b> | <i>mtlF<sup>b</sup></i> | <b>PTS mannitol transporter subunit IIA<sup>b</sup></b>   | <b>-3.6</b>                                                                    |
| <b>BMMGA3_RS01080</b> | <i>mtlD<sup>b</sup></i> | <b>mannitol-1-phosphate 5-dehydrogenase<sup>b</sup></b>   | <b>-3.9</b>                                                                    |
| BMMGA3_RS01710        |                         | adenine deaminase                                         | 2.3                                                                            |
| BMMGA3_RS02480        |                         | sigma-54-dependent Fis family transcriptional regulator   | 3.2                                                                            |
| BMMGA3_RS16990        |                         | <i>inner spore coat protein D (CotD)</i>                  | 5.3                                                                            |
| BMMGA3_RS03910        |                         | long-chain-fatty-acid-CoA ligase                          | 2.2                                                                            |
| BMMGA3_RS04600        | <i>glnH</i>             | glutamine ABC transporter substrate-binding protein       | 2.1                                                                            |
| BMMGA3_RS04630        |                         | methyl-accepting chemotaxis protein                       | -5.0                                                                           |
| BMMGA3_RS04635        |                         | thioester reductase                                       | -2.8                                                                           |
| BMMGA3_RS04655        |                         | PilZ domain-containing protein                            | -4.5                                                                           |
| BMMGA3_RS04675        |                         | <i>No putative conserved domains</i>                      | -3.2                                                                           |
| BMMGA3_RS04745        | <i>ytdA</i>             | UTP--glucose-1-phosphate uridylyltransferase              | 3.8                                                                            |
| BMMGA3_RS05030        |                         | <i>YkyB-like protein</i>                                  | 2.4                                                                            |
| BMMGA3_RS05290        |                         | cytochrome c oxidase subunit IVB                          | -2.4                                                                           |
| BMMGA3_RS05610        | <i>pyrP</i>             | uracil transporter                                        | -2.3                                                                           |
| BMMGA3_RS05615        | <i>pyrB</i>             | aspartate carbamoyltransferase catalytic subunit          | -3.1                                                                           |

|                       |                         |                                                      |            |
|-----------------------|-------------------------|------------------------------------------------------|------------|
| BMMGA3_RS05625        | <i>pyrAA</i>            | carbamoyl-phosphate synthase small subunit           | -2.0       |
| BMMGA3_RS05645        | <i>pyrF</i>             | orotidine-5'-phosphate decarboxylase                 | -2.0       |
| BMMGA3_RS06870        |                         | <i>No putative conserved domains</i>                 | 4.1        |
| BMMGA3_RS06885        | <i>gca</i>              | GDP-mannose 4,6-dehydratase                          | 3.3        |
| BMMGA3_RS06910        |                         | <i>No putative conserved domains</i>                 | 5.8        |
| BMMGA3_RS06940        |                         | Spore coat protein                                   | 4.9        |
| BMMGA3_RS07255        |                         | <i>No putative conserved domains</i>                 | 6.3        |
| <b>BMMGA3_RS07325</b> |                         | <b>transcriptional antiterminator BglG</b>           | <b>3.0</b> |
| <b>BMMGA3_RS07330</b> | <i>atIA<sup>c</sup></i> | <b>IIA arabinol PTS component<sup>c</sup></b>        | <b>3.1</b> |
| <b>BMMGA3_RS07335</b> | <i>atIB<sup>c</sup></i> | <b>IIB arabinol PTS component<sup>c</sup></b>        | <b>3.4</b> |
| <b>BMMGA3_RS07340</b> | <i>atIC<sup>c</sup></i> | <b>IIC arabinol PTS component<sup>c</sup></b>        | <b>2.7</b> |
| <b>BMMGA3_RS07345</b> | <i>atID<sup>c</sup></i> | <b>Arabinol phosphate dehydrogenase<sup>c</sup></b>  | <b>2.9</b> |
| <b>BMMGA3_RS07350</b> |                         | <i>No putative conserved domains</i>                 | <b>3.0</b> |
| <b>BMMGA3_RS07355</b> |                         | <b>galactitol-1-phosphate 5-dehydrogenase</b>        | <b>3.0</b> |
| <b>BMMGA3_RS07360</b> | <i>mtnA</i>             | <b>S-methyl-5-thioribose-1-phosphate isomerase</b>   | <b>2.2</b> |
| BMMGA3_RS07750        | <i>desR</i>             | DNA-binding response regulator                       | -3.8       |
| BMMGA3_RS07755        | <i>desK</i>             | sensor histidine kinase                              | -4.0       |
| BMMGA3_RS07760        | <i>des</i>              | fatty acid desaturase                                | -5.5       |
| BMMGA3_RS07780        |                         | glutamine amidotransferase                           | 3.5        |
| BMMGA3_RS07980        |                         | molybdopterin molybdenumtransferase MoeA             | 2.2        |
| BMMGA3_RS07985        |                         | nucleotidyltransferase family protein                | 2.6        |
| BMMGA3_RS07990        |                         | xanthine dehydrogenase                               | 2.6        |
| BMMGA3_RS08000        |                         | VWA domain-containing protein                        | 3.1        |
| BMMGA3_RS08005        |                         | MoxR family ATPase                                   | 3.0        |
| BMMGA3_RS08010        |                         | carbon monoxide dehydrogenase subunit G              | 3.3        |
| BMMGA3_RS08015        |                         | YHS domain-containing protein                        | 3.5        |
| BMMGA3_RS08020        | <i>cutL</i>             | carbon-monoxide dehydrogenase large subunit          | 3.5        |
| BMMGA3_RS08025        | <i>cutS</i>             | (2Fe-2S)-binding protein                             | 3.1        |
| BMMGA3_RS08030        |                         | molybdopterin dehydrogenase FAD-binding protein      | 3.4        |
| BMMGA3_RS08045        | <i>dhaS2</i>            | xanthine dehydrogenase family protein subunit M      | 3.4        |
| BMMGA3_RS08220        |                         | <i>amyloid fiber anchoring/assembly protein TapA</i> | 2.1        |
| BMMGA3_RS10055        |                         | <i>No putative conserved domains</i>                 | -4.6       |
| BMMGA3_RS10715        | <i>scoB</i>             | CoA transferase subunit B                            | 2.8        |
| BMMGA3_RS10720        | <i>scoA</i>             | CoA transferase subunit A                            | 2.6        |
| BMMGA3_RS10740        |                         | cytochrome ubiquinol oxidase subunit I               | -2.5       |
| BMMGA3_RS12425        | <i>lcfA</i>             | long-chain fatty acid--CoA ligase                    | 2.4        |
| BMMGA3_RS13000        |                         | DeoR family transcriptional regulator                | -3.8       |

|                |              |                                            |      |
|----------------|--------------|--------------------------------------------|------|
| BMMGA3_RS13035 | <i>ywcA</i>  | cation acetate symporter                   | 2.1  |
| BMMGA3_RS13925 | <i>fadE</i>  | acyl-CoA dehydrogenase                     | 2.8  |
| BMMGA3_RS13930 | <i>fadA</i>  | acetyl-CoA acetyltransferase               | 2.3  |
| BMMGA3_RS13935 | <i>fadN</i>  | 3-hydroxyacyl-CoA dehydrogenase            | 2.8  |
| BMMGA3_RS14465 |              | flagella export chaperone FliS             | -2.6 |
| BMMGA3_RS14470 | <i>fliD</i>  | flagellar cap protein FliD                 | -2.6 |
| BMMGA3_RS14490 |              | flagellin domain protein                   | -2.9 |
| BMMGA3_RS14735 |              | <i>No putative conserved domains</i>       | -2.4 |
| BMMGA3_RS15110 |              | DNA-binding protein                        | -2.6 |
| BMMGA3_RS15420 | <i>nuoD</i>  | NAD(P)H-quinone oxidoreductase subunit H   | 2.1  |
| BMMGA3_RS15425 |              | NADH dehydrogenase subunit C               | 2.3  |
| BMMGA3_RS15615 | <i>mutB2</i> | methylmalonyl-CoA mutase                   | 2.4  |
| BMMGA3_RS15620 |              | TetR/AcrR family transcriptional regulator | 2.4  |
| BMMGA3_RS15625 | <i>acdA</i>  | acyl-CoA dehydrogenase                     | 2.2  |
| BMMGA3_RS15630 | <i>mmgC</i>  | acyl-CoA dehydrogenase                     | 2.6  |
| BMMGA3_RS15635 | <i>mmgB</i>  | 3-hydroxybutyryl-CoA dehydrogenase         | 2.6  |
| BMMGA3_RS15640 |              | acetyl-CoA C-acyltransferase               | 2.8  |

<sup>a</sup> Cut-off values set to a change in expression level higher than 30;  $P \leq 0.01$ , determined by Student's *t* test.

<sup>b</sup> Annotation according to Irla *et al.* (2016).

<sup>c</sup> Annotation according to this work's findings.

Differentially expressed genes belonging to the mannitol and arabitol operons are shown in bold.

BLASTx analysis results are shown in italics.

**Supplementary Table 4.** Growth rates, biomass yields and uptake rates of complemented *C. glutamicum*  $\Delta$ *mtlD* strains grown on 30 mM arabitol.

| Strain and genotype                                                   | Growth rate        | Biomass yield            | Uptake rate                                 |
|-----------------------------------------------------------------------|--------------------|--------------------------|---------------------------------------------|
|                                                                       | (h <sup>-1</sup> ) | (g CDW g <sup>-1</sup> ) | (mmol g CDW <sup>-1</sup> h <sup>-1</sup> ) |
| <i>C. glutamicum</i> $\Delta$ <i>mtlD</i> (pVWEx1- <i>atlABCD</i> )   | 0.10 ± 0.01        | 0.33 ± 0.02              | 1.9 ± 0.1                                   |
| <i>C. glutamicum</i> $\Delta$ <i>mtlD</i> (pVWEx1- <i>atlD</i> )      | 0.11 ± 0.00        | 0.31 ± 0.01              | 2.3 ± 0.0                                   |
| <i>C. glutamicum</i> $\Delta$ <i>mtlD</i> (pVWEx1- <i>atlABCDEF</i> ) | 0.11 ± 0.01        | 0.33 ± 0.03              | 2.2 ± 0.0                                   |

## Supplementary Figures

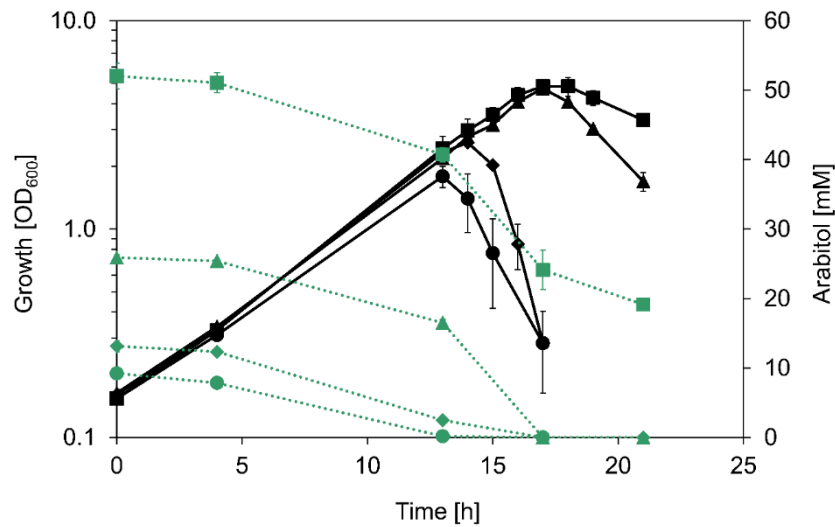

**Supplementary Figure 1.** Growth (black, solid lines) and substrate consumption (green, dotted lines) of *B. methanolicus* MGA3 in minimal media containing 10 mM (dots), 15 mM (diamonds) 30 mM (triangles) and 60 mM (squares) arabinol. Mean values and standard deviations of triplicate shake flask cultures are given.

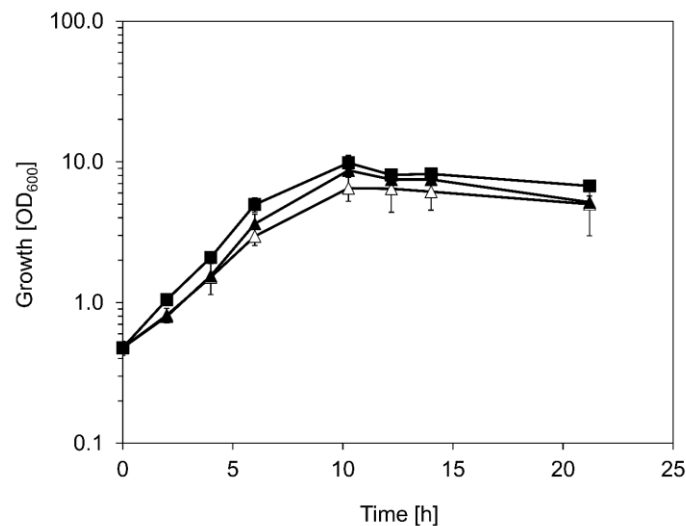

**Supplementary Figure 2.** Growth of *C. glutamicum* strains WT(pVWEx1) (full squares),  $\Delta mtlD$ (pVWEx1) (empty triangles) and  $\Delta mtlD$ (pVWEx1-*atlABCD*) expressing *atlABCD* genes from *B. methanolicus* MGA3 under IPTG induction (full triangles) in minimal media containing 30 mM glucose. Growth rates were determined to be  $0.30 \pm 0.01 \text{ h}^{-1}$ ,  $0.26 \pm 0.01 \text{ h}^{-1}$  and  $0.29 \pm 0.00 \text{ h}^{-1}$ , respectively. Mean values and standard deviations of triplicate shake flask cultures are given.

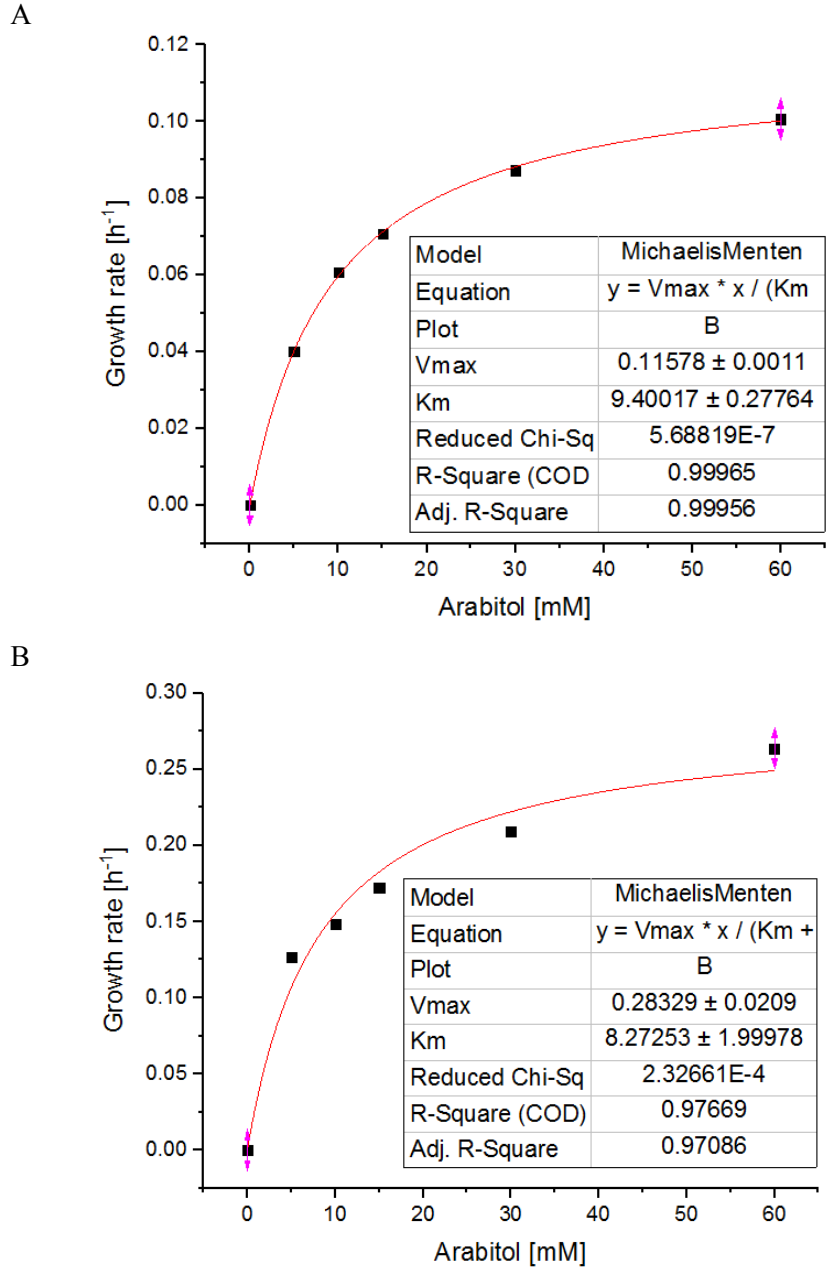

**Supplementary Figure 3.** Growth rates of *C. glutamicum*  $\Delta mtlD(pVWEx1-atlABCD)$  (A) and *C. glutamicum* WT(pVWEx1) (B) in the presence of 5, 10, 15, 30 and 60 mM arabitol. A relation between growth rate and substrate concentration was generated with the Michaelis Menten model using the OriginPro software version 2018 (OriginLab Corporation, Northampton, MA, USA).

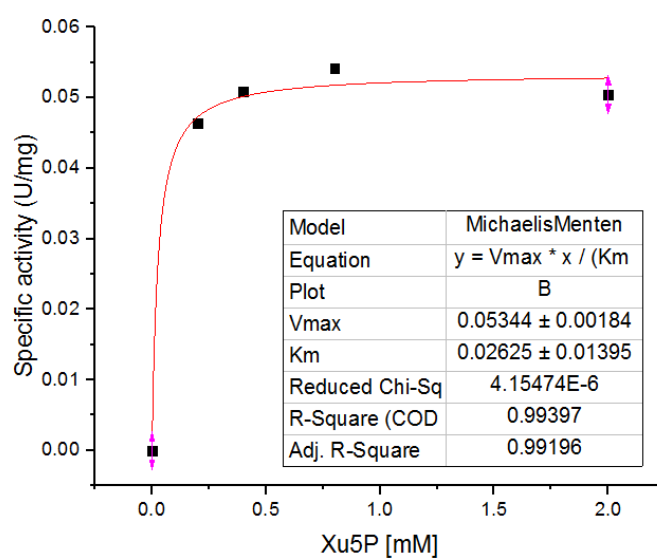

**Supplementary Figure 4.** Arabitol phosphate dehydrogenase activities of *B. methanolicus* crude extracts grown on arabitol in the presence of varying concentrations of xylulose 5-phosphate (Xu5P). Affinity for the substrate Xu5P was determined with the Michaelis Menten model using the OriginPro software version 2018 (OriginLab Corporation, Northampton, MA, USA).
